# Supplementary material for: A New Genetic Linkage Map of the Zygomycete Fungus Phycomyces blakesleeanus
Source: PLoS One. 2013 Mar 14;8(3):e58931. doi: 10.1371/journal.pone.0058931 (PMC3597544; doi:10.1371/journal.pone.0058931)
Supplement: Dataset S2 — Allele segregation in progeny isolated from crosses between UBC21×A2 and A34×progeny 82A. Strains with alleles from both parents are designated U and shaded blue. (XLS) [file pone.0058931.s004.xls]

## Sheet: UBC21 x B2 (madC) (2)
Phycomyces blakesleeanus B2 x UBC21 mapping data for madC
Allele Assignments A- Mad C; B- allele from Wild Type UBC21
Marker Name	Contig	madC	wt	RE	Progeny wt																																			madC
		A-NRRL	B-UBC21		B2-3	B2-10	B2-12	B2-14	B2-17	B2-18	B2-22	B2-23	B2-25	B2-26	B2-28	B2-32	B2-33	B2-34	B2-41	B2-43	B2-44	B2-46	B2-47	B2-51	B2-54	B2-57	B2-58	B2-60	B2-67	B2-68	B2-75	B2-76	B2-77	B2-80	B2-82	B2-85	B2-86	B2-89	B2-94	B2-1	B2-2	B2-4	B2-5	B2-6	B2-7	B2-8	B2-9	B2-11	B2-13
madC		A	B		B	B	B	B	B	B	B	B	B	B	B	B	B	B	B	B	B	B	B	B	B	B	B	B	B	B	B	B	B	B	B	B	B	B	B	A	A	A	A	A	A	A	A	A	A
ALID1081-1082	Contig 6	A (lower)	B (higher)	XbaI	B	B	B	B	U	B	B	A	B	B	B	B	B	B	A	A	A	B	B	B	B	B	B	B	B	B	B	B	B	A	B	B	B	B	B	B	A	A	B	A	A	A	B	A	A
ALID190-191	Contig 6	A (lower)	B (higher)	NdeI	B	B	B	B	U	B	B	A	B	B	B	B	B	B	A	A	A	B	B	B	B	B	B	B	B	B	B	B	B	A	B	B	A	B	A	B	A	A	B	A	A	A	B	A	A
ALID393-394	Contig 6	A (lower)	B (higher)	EcoRV	B	B	B	B	U	B	B	A	B	B	B	B	B	B	A	A	A	B	B	B	B	B	B	B	B	B	B	B	B	A	B	B	A	B	B	B	A	A	U	A	A	A	B	A	A
ALID391-392	Contig 6	A (higher)	B (lower)	EcoRV	B	B	B	B	U	B	B	A	B	B	B	B	B	B	B	B	B	B	B	B	B	B	B	B	B	B	B	B	B	B	B	B	A	B	U	A	A	A	A	A	A	A	A	A	A
ALID1077-1078	Contig 21	A (lower)	B (higher)	XbaI	B	B	B	B	U	B	B	B	B	B	B	B	B	B	B	B	B	B	B	B	B	B	B	.	B	B	B	B	B	B	B	B	.	B	U	A	A	A	A	A	A	A	A	A	A
ALID759-760	Contig 21	A (higher)	B (lower)	XhoI	B	B	B	B	U	B	B	B	B	B	B	B	B	.	B	B	B	B	B	B	B	B	B	B	B	B	B	B	B	B	B	B	A	B	A	A	A	A	A	A	A	A	A	A	A
ALID1079-1080	Contig 21	A (higher)	B (lower)	EcoRV	B	B	B	B	U	B	B	B	B	B	B	B	B	B	B	B	B	B	B	B	B	B	B	B	B	B	B	B	B	B	B	B	A	B	U	A	A	A	A	A	A	A	A	A	A
ALID0403-404	Contig 32	A (lower)	B (higher)	EcoRV	B	B	B	B	U	B	B	B	B	B	B	B	B	B	B	B	B	B	B	B	B	B	B	B	B	B	B	B	B	B	B	B	B	B	U	A	A	A	A	A	A	A	A	A	A
ALID1184-1185	Contig 44	A (higher)	B (lower)	NdeI	B	B	B	B	B	B	B	B	B	B	B	B	B	B	B	B	B	B	B	B	B	B	B	B	B	B	B	B	B	B	B	B	A	B	U	A	A	A	A	A	A	A	A	A	A
ALID1017-1018	Contig 54	A (higher)	B (lower)	XhoI	B	B	B	B	U	B	B	B	B	B	B	B	B	B	B	B	B	B	B	B	B	B	B	B	B	B	B	B	B	B	B	B	A	B	A	A	A	A	A	A	A	A	A	A	A
35 wt
58 mutant
11 markers
93 progeny
[truncated: 51 more columns]

## Sheet: UBC21 x A905(madC) (2)
A905 x UBC21
Marker Name	Contig	madC	wt		wt																				madC
		A-NRRL	B-UBC21	RE	1	3	5	6	7	8	9	10	11	12	13	14	16	17	18	19	21	22	23	25	2	4	15	20	24	26	27	28	Recomb	Total	cM
madC		A	B		B	B	B	B	B	B	B	B	B	B	B	B	B	B	B	B	B	B	B	B	A	A	A	A	A	A	A	A
ALID190-191	Contig 6	A (lower)	B (higher)	NdeI	B	B	U	B	A	B	A	B	B	B	A	A	A	B	A	B	B	B	B	B	A	A	A	U	U	A	U	A	6	24	25
ALID391-392	Contig 6	A (higher)	B (lower)	EcoRV	B	B	A	B	B	U	A	B	A	B	A	A	A	B	B	B	B	B	B	B	A	A	A	A	A	A	A	A	6	27	22
ALID393-394	Contig 6	A (lower)	B (higher)	EcoRV	B	B	A	B	A	B	B	B	B	B	A	A	A	B	A	B	B	B	B	B	A	A	A	A	A	A	A	A	6	28	21
ALID1081-1082	Contig 6	A (lower)	B (higher)	XbaI	B	B	A	B	A	B	B	B	B	B	A	A	A	B	A	B	B	B	B	B	A	A	A	.	A	A	A	A	6	27	22
ALID759-760	Contig 21	A (higher)	B (lower)	XhoI	B	B	B	.	B	U	A	.	.	B	A	A	A	B	B	B	B	B	B	B	A	A	A	A	A	A	A	A	4	24	17
ALID1077-1078	Contig 21	A (lower)	B (higher)	XbaI	B	B	B	B	B	U	B	B	B	B	A	A	A	B	B	B	.	B	B	B	A	A	A	A	A	A	A	A	3	26	12
ALID1079-1080	Contig 21	A (higher)	B (lower)	EcoRV	B	B	B	B	B	U	A	.	B	B	A	A	A	B	B	B	B	B	B	B	A	A	A	A	A	A	A	A	4	26	15
ALID360-361	Contig 32	A (higher)	B (lower)	BamHI	B	B	B	B	B	U	B	U	B	A	A	A	A	B	B	B	B	B	B	B	A	A	A	A	A	A	A	A	4	26	15
ALID403-404	Contig 32	A (lower)	B (higher)	EcoRV	B	B	B	B	B	U	A	B	B	B	A	A	A	B	B	B	B	B	B	B	A	A	A	.	A	A	A	A	4	26	15
ALID1184-1185	Contig 44	A (higher)	B (lower)	NdeI	B	B	B	B	B	B	A	B	B	B	A	B	A	B	B	B	B	B	B	B	A	A	A	A	A	A	A	A	3	28	11
ALID1015-1016	Contig 44	A (higher)	B (lower)	NdeI	B	B	B	B	B	B	B	B	B	B	B	A	A	B	B	B	B	.	B	B	A	A	A	A	A	A	A	.	2	26	8
ALID1017-1018	Contig 54	A (higher)	B (lower)	XhoI	B	B	B	B	B	U	B	B	B	B	A	B	A	B	B	B	B	B	B	B	A	A	A	A	A	A	A	A	2	27	7
	Purified
13 markers
28 progeny
Crosses: A905 (madC) x UBC21
Marker Name	wt																				madC
	1	3	5	6	7	8	9	10	11	12	13	14	16	17	18	19	21	22	23	25	2	4	15	20	24	26	27	28	Recomb	Total	cM
madC (A905)	A	A	A	A	A	A	A	A	A	A	A	A	A	A	A	A	A	A	A	A	G	G	G	G	G	G	G	G
32ALID936-ALID429	A	A	A	.	A	U	A	U	A	A	A	A	A	A	A	A	A	A	A	A	G	G	G	G	.	G	G	G
MseI T^TAA	A to G
markers-2
individual-28
20 wt
8 mutant

## Sheet: UBC21 x A202  (madC)
A202 x UBC21
Marker Name	Contig	madC	wt		wt																madC
		A-NRRL	B-UBC21	RE	4	5	7	9	11	12	13	14	16	19	20	21	24	26	29	31	1	2	3	6	8	10	15	17	18	22	23	25	27	28	30	32	Recomb	Total	cM
madC		A	B		B	B	B	B	B	B	B	B	B	B	B	B	B	B	B	B	A	A	A	A	A	A	A	A	A	A	A	A	A	A	A	A
ALID403-404	Contig 32	A (lower)	B (higher)	EcoRV	B	B	B	B	B	B	B	B	B	B	B	B	B	B	B	B	A	A	B	A	A	A	A	.	A	A	.	A	A	A	A	A	1	30	3.3
16 wt
16 mad
2 markers
32 progeny

## Sheet: Dataset S3
UBC21 x A2
	Parents			Progeny
Marker	A	U		1	2	3	4	5	6	7	8	9	10
5-FU	R	S		S	S	R	R	S	R	R	R	R	S
furA nt	A	B		B	B	A	A	B	A	A	A	A	B
pyrG nt	A	B		B	A	A	B	B	B	A	A	A	A
ALID0237	A	B		A	A	B	A	A	A	A	A	A	A
ALID0782	A	B		B	A	B	B	A	A	A	A	A	A
sex	(-)	(+)		(-)	(-)	(-)	(+)	(-)	(+)	(+)	(+)	(+)	(+)
A34 x [NRRL1555 X UBC21 progeny 82A]
	Parents			Progeny
Marker	A	82		1	2	3	4	5	6	7	8	9	10	11	12	13	14	15
5-FU	R	S		R	S	S	R	R	R	R	R	S	S	R	R	S	R	S
madD	D	WT		D	WT	WT	D	D	D	D	D	WT	WT	D	D	WT	D	WT
sex	(+)	(-)		(+)	(-)	(+)	(+)	(+)	(+)	(+)	(+)	(+)	(-)	(+)	(-)	(-)	(-)	(+)
pyrG nt	A	B		B	B	B	A	B	B	U	B	B	B	B	B	A	B	B
